# Supplementary material for: Evolutionary pathways to antibiotic resistance are dependent upon environmental structure and bacterial lifestyle
Source: eLife journal article supplement (doi:10.7554/elife.47612), 2019-09-13
Supplement: supp [file elife-47612-supp-v1.zip]

Archive with 8 entries (8 files):
- elife_poa_e47612_Figure_2_figure_supplement_2.pdf
- elife_poa_e47612_Figure_3_source_data_1.xlsx
- elife_poa_e47612_Transparent_Reporting_File.docx
- elife_poa_e47612_Supplementary_file_2.xlsx
- elife_poa_e47612_Figure_2_figure_supplement_1.pdf
- elife_poa_e47612_Figure_2_source_data_1.xlsx
- elife_poa_e47612_Supplementary_file_1.xlsx
- elife_poa_e47612_Figure_2_figure_supplement_3.pdf
