# Supplementary material for: Evolutionary pathways to antibiotic resistance are dependent upon environmental structure and bacterial lifestyle
Source: eLife journal article supplement (doi:10.7554/elife.47612), 2019-09-13
Supplement: supp [file elife-47612-supp-v1.zip › elife_poa_e47612_Figure_2_source_data_1.xlsx]

## Sheet: Mutation frequency data
	P4.60X	P4.70X	P4.80X	P9.60X	P9.70X	P9.80X	P12.60X	P12.70X	P12.80X	P1.20.5X	P1.50.5X	P1.80.5X	P3.20.5X	P3.50.5X	P3.80.5X	P4.20.5X	P4.50.5X	P4.80.5X	P9.20.5X	P9.50.5X	P9.80.5X	P12.20.5X	P12.50.5X	P12.80.5X	P4.21X	P4.51X	P4.81X	P6.21X	P6.51X	P6.81X	P7.22X	P7.52X	P7.82X	P9.22X	P9.52X	P9.82X	P10.24X	P10.54X	P10.84X	P12.24X	P12.54X	P12.84X	B4.100X	B4.40X	B4.90X	B9.100X	B9.40X	B9.90X	B12.100X
day	4	4	4	9	9	9	12	12	12	1	1	1	3	3	3	4	4	4	9	9	9	12	12	12	4	4	4	6	6	6	7	7	7	9	9	9	10	10	10	12	12	12	4	4	4	9	9	9	12
xmic	0	0	0	0	0	0	0	0	0	0.5	0.5	0.5	0.5	0.5	0.5	0.5	0.5	0.5	0.5	0.5	0.5	0.5	0.5	0.5	1	1	1	1	1	1	2	2	2	2	2	2	4	4	4	4	4	4	0	0	0	0	0	0	0
replicate	6	7	8	6	7	8	6	7	8	2	5	8	2	5	8	2	5	8	2	5	8	2	5	8	2	5	8	2	5	8	2	5	8	2	5	8	2	5	8	2	5	8	10	4	9	10	4	9	10
coding(190/654nt)::ACX60_RS07895::TetR family transcriptional regulator	0	0	0	0	0	0	0	0	0	100	0	0	100	0	0	100	0	0	100	0	0	100	0	0	100	0	0	100	0	0	100	0	0	100	0	0	100	0	0	100	0	0	0	0	0	0	0	0	0
coding(416/654nt)::ACX60_RS07895::TetR family transcriptional regulator	0	0	0	0	0	0	0	0	0	0	100	0	0	100	0	0	100	0	0	100	0	0	100	0	0	100	0	0	100	0	0	100	0	0	100	0	0	100	0	0	100	0	0	0	0	0	0	0	0
coding(303/654nt)::ACX60_RS07895::TetR family transcriptional regulator	0	0	0	0	0	0	0	0	0	0	0	0	0	0	0	0	0	0	0	0	0	0	0	0	0	0	0	0	0	0	0	0	0	0	0	0	0	0	0	0	0	0	0	0	0	0	0	0	0
coding(13391398/2121nt)::ACX60_RS07310::DNA polymerase III subunit gamma/tau	0	0	0	0	0	0	0	0	0	0	0	0	0	0	0	0	0	0	0	0	0	0	0	0	0	0	0	0	0	0	0	0	0	0	0	0	100	0	0	0	0	0	0	0	0	0	0	0	0
coding(1555/2277nt)::ACX60_RS08285::ATPdependent Clp protease ATPbinding subunit ClpA	0	0	0	0	0	0	0	0	0	0	0	0	0	0	0	0	0	0	0	0	0	7.6	0	0	0	0	0	5.2	0	0	0	0	0	0	0	0	0	0	0	0	0	0	0	0	0	0	0	0	0
coding(164/249nt)::ACX60_RS18675::hypothetical protein	0	0	0	0	0	0	0	0	0	0	0	0	0	0	0	0	0	0	0	0	0	0	29.7	0	0	0	0	0	0	0	0	0	0	0	0	0	0	0	0	0	0	0	0	0	0	0	0	0	0
coding(251262/1032nt)::ACX60_RS06025::LysR family transcriptional regulator	0	0	0	0	0	0	0	0	0	0	0	0	0	0	0	0	0	0	0	0	0	0	0	0	0	0	0	0	0	0	0	0	0	0	0	0	0	0	0	0	0	0	0	0	0	0	0	0	0
coding(261271/963nt)::ACX60_RS05355::protease SohB	0	0	0	0	0	0	0	0	0	0	0	0	0	0	0	0	0	0	0	0	0	0	0	0	0	0	0	0	0	0	0	0	0	0	0	0	0	0	0	0	0	0	0	0	0	0	0	0	0
coding(421432/1086nt)::ACX60_RS09115::twocomponent sensor histidine kinase AdeS	0	0	0	0	0	0	0	0	0	0	0	0	0	0	0	0	0	0	0	0	0	45	0	0	0	0	0	17.5	0	0	0	0	0	0	0	10.7	0	0	0	0	0	0	0	0	0	0	0	0	0
coding(467484/963nt)::ACX60_RS05355::protease SohB	0	0	0	0	0	0	0	0	0	0	0	0	0	0	0	0	0	0	0	0	0	0	0	0	0	0	0	0	0	0	0	0	0	0	0	0	0	0	0	5.4	0	0	0	0	0	5.2	0	0	6.4
coding(50/327nt)::ACX60_RS16750::DNAbinding protein	0	0	0	0	0	0	0	0	0	0	0	0	0	0	0	0	0	0	0	0	11.8	0	0	12	0	0	0	0	0	0	0	0	8.9	0	0	0	0	0	0	6.2	0	0	0	0	0	0	0	0	0
coding(574582/963nt)::ACX60_RS05355::protease SohB	0	0	0	0	0	0	0	0	0	0	0	0	0	0	0	0	0	0	0	0	0	0	0	0	0	0	0	0	0	0	0	0	0	0	0	0	0	0	0	0	0	0	0	0	0	0	0	0	0
coding(58/654nt)::ACX60_RS07895::TetR family transcriptional regulator	0	0	0	0	0	0	0	0	0	0	0	0	0	0	0	0	0	0	0	0	0	0	0	0	0	0	0	0	0	0	0	0	0	0	0	0	0	0	0	0	0	0	0	0	0	0	0	0	0
coding(644742/2439nt)::ACX60_RS00605::peptidase, M23 family protein	0	0	0	0	0	0	0	0	0	0	0	0	0	0	0	0	0	0	0	0	0	0	0	0	0	0	0	0	0	0	0	0	0	0	11.1	0	0	0	0	0	0	0	0	0	0	0	0	0	0
coding(644751/2439nt)::ACX60_RS00605::peptidase, M23 family protein	0	0	0	0	0	0	0	0	0	0	0	0	0	0	0	0	0	0	0	0	9.1	0	0	9	0	0	0	0	0	0	0	5.2	0	0	0	0	0	0	0	0	0	0	0	5.7	0	0	0	0	0
coding(684693/768nt)::ACX60_RS00705::hypothetical protein	0	0	0	0	0	0	0	0	0	0	0	0	0	0	0	0	0	0	0	0	0	0	0	0	0	0	0	0	0	0	0	0	0	0	0	0	0	0	0	0	0	0	0	0	0	0	0	0	0
coding(693702/963nt)::ACX60_RS05355::protease SohB	0	0	0	0	0	0	0	0	0	0	0	0	0	0	0	0	0	0	0	0	0	0	0	0	0	0	0	0	0	0	0	0	0	0	0	0	0	0	0	0	0	0	0	0	0	0	0	0	0
coding(791/963nt)::ACX60_RS05355::protease SohB	0	0	0	0	0	0	0	0	0	0	0	0	0	0	0	0	0	0	0	0	0	0	0	0	0	0	0	0	0	0	0	0	0	0	0	0	0	0	0	0	0	0	0	0	0	0	0	0	0
coding(8587/183nt)::ACX60_RS00600::hypothetical protein	0	0	0	0	0	5.6	0	0	0	5.8	0	0	0	0	0	5.4	0	0	0	0	0	0	0	0	0	0	0	0	0	0	0	0	0	0	0	0	0	0	0	0	5	0	0	0	0	5.3	0	0	0
coding(944/1032nt)::ACX60_RS06025::LysR family transcriptional regulator	0	0	0	0	0	0	0	0	0	0	0	0	0	0	0	0	0	0	0	0	0	0	0	0	0	0	0	0	0	0	0	0	0	0	0	0	0	0	0	0	0	0	0	0	0	0	0	0	0
D162D(GATGAC)::ACX60_RS11185::stressinduced protein	0	0	0	0	0	0	0	0	0	0	0	0	0	0	0	0	0	0	0	0	0	0	0	0	0	0	0	0	0	0	0	0	0	0	0	0	0	0	0	0	0	0	0	0	0	0	0	0	0
D215E(GATGAG)::ACX60_RS03175::SPOR domaincontaining protein	0	0	0	0	0	0	0	0	0	0	0	0	0	0	0	0	0	0	0	0	0	0	0	0	0	0	0	0	0	14.2	0	0	0	0	0	0	0	0	0	0	0	0	0	0	0	0	0	0	0
D46A(GACGCC)::ACX60_RS18730::sulfonamideresistant dihydropteroate synthase Sul2	0	0	0	0	0	0	0	0	0	0	0	0	0	9.3	0	0	0	0	0	0	0	0	0	0	0	0	0	0	0	0	0	0	0	0	0	0	0	0	0	0	0	0	0	0	0	0	0	0	0
D55A(GACGCC)::ACX60_RS18730::sulfonamideresistant dihydropteroate synthase Sul2	0	0	0	0	0	0	0	0	0	0	0	0	0	0	0	0	0	0	0	0	0	0	0	0	0	0	0	0	0	0	0	0	0	0	0	0	6	0	0	0	0	0	0	0	0	0	0	0	0
E34*(GAGTAG)::ACX60_RS07895::TetR family transcriptional regulator	0	0	0	0	0	0	0	0	0	0	0	0	0	0	0	0	0	0	0	0	0	0	0	0	0	0	0	0	0	0	0	0	0	0	0	0	0	0	0	0	0	0	0	0	0	0	0	0	0
F151Y(TTTTAT)::ACX60_RS17100::DNA topoisomerase IV subunit A	0	0	0	0	0	0	0	0	0	0	0	0	0	0	0	0	0	0	0	0	0	0	0	0	0	0	0	0	0	0	0	0	0	0	0	0	0	0	0	16.2	0	0	0	0	0	0	0	0	0
F361F(TTCTTT)::ACX60_RS11400::hypothetical protein	0	0	0	0	0	0	0	0	0	0	0	0	0	0	0	0	0	0	0	0	0	0	0	0	0	0	0	0	0	0	0	0	0	0	0	0	0	12.9	0	0	0	0	0	0	0	0	0	0	0
G87C(GGTTGT)::ACX60_RS12490::hypothetical protein	0	0	0	0	0	0	0	0	0	0	0	0	0	0	0	0	0	0	0	0	0	0	0	0	0	0	0	0	0	0	0	0	0	0	0	0	0	0	0	0	0	0	0	0	0	0	0	0	0
H141Y(CATTAT)::ACX60_RS03840::phosphatidylglycerophosphatase	0	0	0	0	0	0	0	0	0	0	0	100	0	0	100	0	0	100	0	0	100	0	0	100	0	0	100	0	0	100	0	0	100	0	0	100	0	0	100	0	0	100	0	0	0	0	0	0	0
H84Y(CATTAT)::ACX60_RS06025::LysR family transcriptional regulator	0	0	0	0	0	0	0	0	0	0	0	0	0	0	0	0	0	0	0	0	0	0	0	0	0	0	0	0	0	0	0	0	0	0	0	0	0	0	0	0	0	0	0	0	0	0	0	0	0
I325N(ATCAAC)::ACX60_RS16555::fatty acid oxidation complex subunit alpha FadB	0	0	0	0	0	0	0	0	0	0	0	0	0	0	0	0	0	0	0	0	0	0	0	0	0	0	0	0	0	0	0	0	0	0	0	0	0	0	0	0	0	0	0	0	0	0	0	0	0
intergenic(+145/65)::ACX60_RS01710/ACX60_RS01715::membrane protein/hemerythrin	0	0	0	0	0	0	0	0	0	0	0	0	0	0	0	0	0	0	0	0	0	0	0	0	0	0	0	0	0	0	0	11.1	0	0	0	0	0	0	0	0	0	0	0	0	0	0	0	0	0
intergenic(+157/+597)::ACX60_RS07500/ACX60_RS07505::hypothetical protein/hypothetical protein	0	0	0	0	0	0	0	0	0	0	0	0	0	0	0	0	0	0	0	0	0	0	0	0	0	0	0	0	0	0	0	0	0	0	0	0	0	0	0	0	0	0	0	0	0	0	0	0	0
intergenic(+19/11)::ACX60_RS19365/ACX60_RS19370::IS4 family transposase/transcriptional regulator	0	0	0	0	0	0	0	0	0	0	0	0	0	0	0	0	0	0	0	0	0	0	0	0	0	0	0	0	0	0	0	0	0	0	0	0	0	0	0	0	0	0	0	0	0	0	0	0	0
intergenic(+266/174)::ACX60_RS01065/ACX60_RS01070::quercetin 2,3dioxygenase/hypothetical protein	0	0	0	0	0	0	0	0	0	0	0	0	0	0	0	0	0	0	0	0	0	0	0	0	0	0	0	0	0	0	0	0	0	0	0	0	0	0	0	0	0	0	0	0	0	0	0	0	0
intergenic(+56/+332)::ACX60_RS06660/ACX60_RS06665::tRNA uridine5carboxymethylaminomethyl(34) synthesis enzyme MnmG/WYL domaincontaining protein	0	0	0	0	0	0	0	0	0	0	0	0	0	0	0	0	0	0	0	0	0	0	0	0	0	0	0	0	0	0	0	0	0	0	0	0	0	0	0	0	0	0	0	0	0	0	0	0	0
intergenic(124/284)::ACX60_RS06885/ACX60_RS06890::gammaglutamylputrescine synthetase/hypothetical protein	0	0	0	0	0	0	0	0	0	0	0	0	0	0	0	0	0	0	0	0	0	0	0	0	0	0	0	0	0	0	0	0	0	0	0	0	0	0	0	0	0	0	0	0	0	0	0	0	0
intergenic(128/+550)::ACX60_RS09465/ACX60_RS09475::YcgL domaincontaining protein/hypothetical protein	0	0	0	0	0	0	0	0	0	0	0	0	0	0	0	0	0	0	0	0	0	0	0	0	0	0	0	0	0	0	0	0	0	0	0	0	0	0	0	0	0	0	0	0	0	0	0	0	0
intergenic(142/+183)::ACX60_RS16620/ACX60_RS16625::membrane protein/sodium:proton antiporter	0	0	0	0	0	0	0	0	0	0	0	0	0	0	0	0	0	0	0	0	0	0	0	0	0	0	0	0	0	0	0	0	0	0	0	0	0	0	0	0	0	0	0	0	0	0	0	0	0
intergenic(158/+143)::ACX60_RS00150/ACX60_RS00155::pyrimidine permease/phosphoenolpyruvate carboxylase	0	0	0	0	0	0	0	0	0	0	0	0	0	0	0	0	0	0	0	0	0	0	0	0	0	0	0	0	0	0	0	0	0	0	0	0	0	0	0	0	0	0	0	0	0	0	0	0	0
intergenic(166/191)::ACX60_RS19235/ACX60_RS13355::hypothetical protein/citrate transporter	0	0	0	0	0	33.3	0	0	0	0	0	0	0	0	0	0	0	0	0	0	0	0	0	0	0	0	0	0	0	0	0	0	0	0	0	0	0	0	0	0	0	0	0	0	0	0	0	0	0
intergenic(190/197)::ACX60_RS04165/ACX60_RS04170::MFS transporter/glycerol kinase	0	0	0	0	0	0	0	0	0	0	0	0	0	0	0	0	0	0	0	0	0	0	6.2	0	0	0	0	0	0	0	0	0	0	0	0	0	5.5	0	0	0	0	0	0	0	0	0	0	0	0
intergenic(194/171)::ACX60_RS09410/ACX60_RS09415::ABC transporter substratebinding protein/lipoyl synthase	0	0	0	0	0	0	0	0	0	0	0	0	0	0	0	0	0	0	0	0	0	0	0	0	0	0	0	0	0	0	0	0	0	0	0	0	0	0	0	0	0	0	0	0	0	0	0	0	0
intergenic(237/177)::ACX60_RS09270/aspA::hypothetical protein/aspartate ammonialyase	0	0	0	0	0	23.6	0	0	0	0	0	0	0	0	0	0	0	0	0	0	0	0	0	0	0	0	0	0	0	0	0	0	0	0	0	0	0	0	0	0	0	0	0	0	0	0	0	0	0
intergenic(243/249)::ACX60_RS12760/ACX60_RS12765::MFS transporter/(2Fe2S)binding protein	0	0	0	0	0	0	0	0	0	0	0	0	0	0	0	0	0	0	0	0	0	0	0	0	0	0	0	0	0	0	0	0	0	0	0	0	0	0	0	0	0	0	0	0	0	0	0	0	0
intergenic(245/)::A1S_3470/::regulatory protein LysR/	0	0	0	0	0	0	0	0	0	0	0	0	0	0	0	0	0	0	0	0	0	0	0	0	0	0	0	0	0	0	0	0	0	0	0	0	34.9	0	0	0	0	0	0	0	0	0	0	0	0
intergenic(346/+157)::ACX60_RS09480/ACX60_RS09485::hypothetical protein/ribonuclease D	0	0	0	0	0	0	0	0	0	0	0	0	0	0	0	0	0	0	0	0	0	0	0	0	0	0	0	0	0	0	0	0	13.3	0	0	0	0	0	0	0	0	0	0	0	0	0	0	0	0
intergenic(367/79)::ACX60_RS10565/ACX60_RS10570::hypothetical protein/hypothetical protein	0	0	0	0	0	0	0	0	0	0	0	0	0	0	0	0	0	0	0	0	0	0	0	0	0	0	0	0	0	0	0	0	0	0	0	0	0	0	0	0	0	0	0	0	0	0	0	0	19.1
intergenic(44/11)::ACX60_RS19285/ACX60_RS15145::hypothetical protein/MFS transporter	0	0	0	0	0	0	0	0	0	0	0	0	0	0	0	0	0	0	0	28	0	0	28.4	0	0	0	0	0	94.3	0	0	100	0	0	100	0	0	100	0	0	100	0	0	0	0	0	0	0	0
intergenic(58/60)::ACX60_RS16125/ACX60_RS16130::YggW family oxidoreductase/hypothetical protein	0	0	0	0	0	0	0	0	0	0	0	0	0	0	0	0	0	0	0	0	0	0	0	0	0	0	0	0	0	0	0	0	0	0	0	10.2	0	0	14.6	0	0	0	0	0	0	0	0	0	0
intergenic(59/59)::ACX60_RS16125/ACX60_RS16130::YggW family oxidoreductase/hypothetical protein	0	0	0	0	0	0	0	0	0	0	0	0	0	0	0	0	0	0	0	0	0	0	0	0	0	0	0	0	0	0	0	0	0	0	0	10.1	0	0	14.3	0	0	0	0	0	0	0	0	0	0
intergenic(9/+242)::ACX60_RS11780/ACX60_RS11785::hypothetical protein/hypothetical protein	0	0	0	0	0	0	0	0	0	0	0	0	0	0	0	0	0	0	0	0	0	0	0	0	0	0	0	0	0	13.3	0	0	0	0	0	0	0	0	0	0	0	0	0	0	0	0	0	0	0
intergenic(98/15)::ACX60_RS02885/ACX60_RS02890::hypothetical protein/phosphopantothenate synthase	0	0	0	0	0	0	0	0	0	0	0	0	0	0	0	0	0	0	0	0	0	0	0	0	0	0	0	0	0	0	0	0	0	0	0	0	0	0	0	0	0	0	0	0	0	0	0	0	0
K180T(AAGACG)::A1S_3462::hypothetical protein	0	0	0	0	0	0	0	0	0	0	0	0	0	0	0	0	0	0	0	0	0	0	0	0	0	0	0	0	0	0	0	0	0	0	0	0	0	0	0	0	0	0	0	6.6	0	0	0	5.2	0
L341R(CTCCGC)::ACX60_RS06025::LysR family transcriptional regulator	0	0	0	0	0	0	0	0	0	0	0	0	0	0	0	0	0	0	0	0	0	0	0	0	0	0	0	0	0	0	0	0	0	0	0	0	0	0	0	0	0	0	0	0	0	0	0	0	0
M1M(GTGATG)::ACX60_RS16135::MATE family efflux transporter	0	0	0	0	0	0	0	0	0	0	0	0	0	0	0	0	0	0	0	0	0	0	0	0	0	0	0	0	0	0	0	0	0	0	0	46.7	0	0	81.3	0	0	6	0	0	0	0	0	0	0
N223T(AACACC)::ACX60_RS18660::conjugal transfer protein TrbJ	0	0	0	0	0	0	0	0	0	0	0	0	0	0	0	0	0	0	0	0	0	0	0	0	0	0	0	0	0	0	0	0	0	0	0	0	0	0	0	0	0	0	0	0	0	0	0	0	0
noncoding(62/74nt)::ACX60_RS04145::tRNACys	0	0	0	0	0	0	0	0	0	0	0	0	0	0	0	0	0	0	0	0	0	0	0	0	0	0	0	0	0	0	0	0	0	0	0	0	0	0	0	0	0	0	0	0	0	0	8.7	8.7	0
pseudogene(211/1172nt)::ACX60_RS14925::hypothetical protein	0	0	0	0	0	0	0	0	0	0	0	0	0	0	0	0	0	0	0	0	0	0	0	0	0	0	0	0	0	0	0	0	0	0	0	0	0	0	0	0	0	0	0	0	0	0	0	0	0
Q128L(CAACTA)::ACX60_RS14940::paminobenzoate synthetase	0	0	0	0	0	0	0	0	0	0	0	0	0	0	0	0	0	0	0	0	0	0	0	0	0	0	0	0	0	0	0	0	0	0	0	0	0	0	0	0	13.5	0	0	0	0	0	0	0	0
Q137H(CAACAC)::ACX60_RS08630::GguC protein	0	0	11	0	0	0	0	0	0	0	0	0	0	0	0	0	0	0	0	0	0	0	0	0	0	0	0	0	0	0	0	0	0	0	0	0	0	0	0	0	0	0	0	0	0	0	0	0	0
Q190*(CAATAA)::ACX60_RS09910::hypothetical protein	0	0	0	0	0	0	0	0	0	0	0	0	0	0	0	0	0	0	0	0	0	0	0	0	0	0	0	0	0	0	0	0	0	0	0	0	0	0	0	0	0	0	0	0	0	0	0	0	0
Q220H(CAACAT)::ACX60_RS01345::DNAbinding response regulator	0	0	0	0	0	0	0	0	0	0	0	0	0	0	0	0	0	0	0	16.8	0	0	71.2	0	0	0	0	0	0	0	0	0	0	0	0	0	0	0	0	0	0	0	0	0	0	0	0	0	0
Q225*(CAATAA)::ACX60_RS00610::hypothetical protein	0	0	0	0	0	0	0	0	0	0	0	0	0	0	0	0	0	0	0	0	0	0	0	0	0	0	0	0	0	0	0	0	0	0	0	0	0	0	0	0	0	0	0	0	0	0	0	0	0
Q310*(CAGTAG)::ACX60_RS06025::LysR family transcriptional regulator	0	0	0	0	0	0	0	0	0	0	0	0	0	0	0	0	0	0	0	0	0	0	0	0	0	0	0	0	0	0	0	0	0	0	0	0	0	0	0	0	0	0	0	0	0	0	0	0	0
R25L(CGTCTT)::ACX60_RS07895::TetR family transcriptional regulator	0	0	0	0	0	0	0	0	0	0	0	0	0	0	0	0	0	0	0	0	0	0	0	0	0	0	0	0	0	0	0	0	0	0	0	0	0	0	0	0	0	0	0	0	0	0	0	0	0
R299R(CGTCGG)::ACX60_RS11185::stressinduced protein	0	0	0	0	0	0	0	0	0	0	0	0	0	0	0	0	0	0	0	0	0	0	0	0	0	0	0	0	0	0	0	0	0	0	0	0	0	0	0	0	0	0	0	0	0	0	0	0	0
S81L(TCATTA)::ACX60_RS04430::DNA gyrase subunit A	0	0	0	0	0	0	0	0	0	0	0	0	0	0	0	0	0	0	0	0	0	0	0	0	0	0	0	25.1	0	0	100	0	0	100	0	0	100	0	0	100	82.8	91.4	0	0	0	0	0	0	0
T59T(ACGACT)::ACX60_RS04750::hypothetical protein	0	0	0	0	0	0	0	0	0	0	0	0	0	0	0	0	0	0	0	0	0	0	0	0	0	0	0	0	0	0	0	0	0	0	0	0	0	0	0	0	0	0	0	0	0	0	0	0	0
T955P(ACCCCC)::ACX60_RS16320::exonuclease V subunit gamma	0	0	0	0	0	0	0	0	0	0	0	0	0	0	0	0	0	0	0	0	0	0	0	0	0	0	0	0	0	0	0	0	0	0	0	0	0	0	0	0	0	0	0	0	0	0	0	0	0
V33G(GTCGGC)::ACX60_RS18690::arsenicalresistance protein	0	0	0	0	0	0	0	0	0	0	0	0	0	0	0	0	0	0	0	0	0	0	0	0	0	0	0	0	0	0	0	0	0	0	0	0	0	0	0	0	0	0	0	0	0	0	0	0	0
V44G(GTTGGT)::ACX60_RS16810::EamA family transporter	0	0	0	0	5.7	0	0	0	0	0	0	0	0	0	0	0	0	0	0	0	0	0	0	0	0	0	0	0	0	0	0	9.5	0	0	0	0	0	0	0	0	0	0	0	0	10.7	0	0	0	0
W237*(TGGTGA)::ACX60_RS05355::protease SohB	0	0	0	0	0	0	0	0	0	0	0	0	0	0	0	0	0	0	0	0	0	0	0	0	0	0	0	0	0	0	0	0	0	0	0	0	0	0	0	0	0	0	0	0	0	0	0	0	0
[truncated: 37 more columns]
