# Supplementary material for: Evolutionary pathways to antibiotic resistance are dependent upon environmental structure and bacterial lifestyle
Source: eLife journal article supplement (doi:10.7554/elife.47612), 2019-09-13
Supplement: supp [file elife-47612-supp-v1.zip › elife_poa_e47612_Figure_3_source_data_1.xlsx]

## Sheet: Summary
		Fitness in Biofilm										Fitness in planktonic
		B1	B2	B3	B4	B5	P1	P2	P3	P4	P5	B1	B2	B3	B4	B5	P1	P2	P3	P4	P5
MIC		0.333333	0.333333	1	0.75	0.5	2.66667	10.6667	5.33333	10.6667	13.3333	0.333333	0.333333	1	0.75	0.5	2.66667	10.6667	5.33333	10.6667	13.3333
Selection rate		1.26256	0.249103	-0.340552	0.959015	0.729987	-0.754666	-0.69967	-0.361766	-0.280821	0.209568	0.304699	1.50051	0.756205	0.333631	-1.05913	-0.728769	0.344202	-0.622101	-0.752855	0.111301
Standard Error MIC		0.0833333	0.0833333	0	0.25	0	0.666667	2.66667	1.33333	2.66667	2.66667	0.0833333	0.0833333	0	0.25	0	0.666667	2.66667	1.33333	2.66667	2.66667
Standard Error selection rate		0.717992	0.366351	0.424936	0.109149	0.176227	0.563923	0.319757	0.524155	0.0921279	0.202941	0.167349	0.47436	0.227419	0.400578	0.504409	0.283682	0.78967	0.499405	0.333256	0.241101

## Sheet: Raw data MICs
Days	0	1	3	4	6	7	9	10	12
Replicate
P1	0.125	2	1	2	4	16	16	8	32
P1	0.125	2	1	2	4	16	8	8	32
P1	0.125	1	1	2	4	16	8	16	16
P2	0.125	1	1	1	4	4	8	16	32
P2	0.125	1	1	1	4	4	8	16	32
P2	0.125	1	1	1	4	8	8	16
P3	0.125	1	1	1	16	16	8	8	4
P3	0.125	1	0.5	2	16	16	8	8	8
P3	0.125	1	1	1	16	16	8	8	8
B1	0.125	0.125	0.5	0.25	0.5	0.5	0.5	0.5	1
B1	0.125	0.125	0.5	0.25	0.5	0.25	0.5	0.5	1
B1	0.125	0.125	0.25	0.25	0.5	0.25	0.25	0.5	1
B2	0.125	0.125	0.5	1	1	0.5	1	1	0.5
B2	0.125	0.125	0.5	1	0.5	0.5	0.5	1	0.5
B2	0.125	0.125	0.5	0.5	0.5	0.5	0.5	0.5	0.5
B3	0.125	0.125	8	4	0.25	0.5	0.5	1	0.5
B3	0.125	0.125	8	4	0.25	0.5	0.5	1	1
B3	0.125	0.125	4	4	0.25	1	0.25	1	1

## Sheet: Raw data fitness
		Selection rate measured in biofilm
	Biofilm
	B1	2.3689	2.62388	-0.150556	1.0472	0.208016
	B2	-0.297985	0.254425	-0.243058	1.28303	2.45706
	B3	0.0123991	-1.0754	-1.58287	0.266087	0.677024
	B4	0.868472	1.09199	1.10841	1.15608	0.570122
	B6	0.246995	0.446243	0.896031	0.807459	1.25321
	Planktonic
	P1	-0.691141	-1.91629	-1.87891	0.330121	0.382893
	P2	-0.822143	-1.11188	-0.00893861	-0.0842603	-1.47113
	P3	0.681848	-0.969409	-0.797736
	P4	-0.418843	-0.449467	-0.0669215	-0.188052
	P5	0.560536	-0.225789	-0.04652	0.550046
		Selection rate measured in planktonic
	Biofilm
	B1	-0.071011	0.00947874	0.63152	0.764664	0.188845
	B2	1.37074	-0.196396	1.55679	2.25595	2.51548
	B3	0.545227	0.38789	0.291785	1.4947	1.06143
	B4	0.784077	-0.465363	0.682178
	B5	-0.653926	-0.231739	-0.538195	-2.81265
	Planktonic
	P1	-1.81555	-0.518206	-0.384025	-0.214032
	P2	-0.712036	-0.445468	1.13387
	P3	-1.52304	-1.10513	0.139762
	P4	-0.581197	-0.838446	-1.98748	-0.194654	-0.1625
	P5	0.302412	0.484014	-0.792944	0.517685	0.0453363
