# Supplementary material for: Evolutionary pathways to antibiotic resistance are dependent upon environmental structure and bacterial lifestyle
Source: eLife journal article supplement (doi:10.7554/elife.47612), 2019-09-13
Supplement: supp [file elife-47612-supp-v1.zip › elife_poa_e47612_Supplementary_file_2.xlsx]

## Sheet: Mutations_ancestor
Locus Tag	Mutation	Annotation	Description
ACX60_RS01385	A→G	E292G (GAG→GGG)	energy‑dependent translational throttle protein EttA
ACX60_RS04575	C→T	R226H (CGT→CAT)	fructose 1,6‑bisphosphatase
ACX60_RS18160	(ATGGTG)9→8	coding (454‑459/987 nt)	cation transporter
Mutated genes in the ancestral strain compared to the A. baumannii ATCC 17978-mff complete genome (GCF_001077675.1) after 10 days of evolution in our experimental planktonic conditions.

## Sheet: Mutations_nucleotides
			Biofilm																								Planktonic
			No antibiotic						Subinhibitory						Increasing concentrations												No antibiotic						Subinhibitory							Increasing concentrations
			1		2		3		1		2		3		N1			N2	1		2			3			1		2		3		1		2		3		1			2			3			N1
Gene	Mutation	Locus_tag
DNA gyrase subunit A	S81L (TCA→TTA)	ACX60_RS04430
DNA gyrase subunit A	coding (241‑242/2715 nt)	ACX60_RS04430
DNA topoisomerase IV subunit B	F294L (TTC→CTC)	ACX60_RS00650
phosphatidylglycerophosphatase	H141Y (CAT→TAT)	ACX60_RS03840
hypothetical protein/MFS transporter	intergenic (-44/-11)	ACX60_RS19285/ACX60_RS15145
50S ribosomal protein L35/transporter	intergenic (‑238/‑11)	ACX60_RS15140 ← / → ACX60_RS15145
hypothetical protein	coding (278/471 nt)	ACX60_RS00320
DNA‑directed RNA polymerase subunit beta'	R104L (CGT→CTT)	ACX60_RS16650
hypothetical protein	coding (1141‑1156/1332 nt)	ACX60_RS10660
DNA‑binding protein	coding (36/327 nt)	ACX60_RS16750
DNA‑binding protein	coding (28/327 nt)	ACX60_RS16750
DNA‑binding protein	coding (116/327 nt)	ACX60_RS16750
DNA‑binding protein	coding (108/327 nt)	ACX60_RS16750
DNA‑binding protein	coding (154/327 nt)	ACX60_RS16750
DNA‑binding protein	coding (146/327 nt)	ACX60_RS16750
YggW family oxidoreductase/hypothetical protein	intergenic (‑59/‑58)	ACX60_RS16125 ← / → ACX60_RS16130
DNA polymerase III sbunit gamma/tau	coding (1339-1398/2121 nt)	ACX60_RS07310
hypothetical protein/MFS transporter	intergenic (‑550/‑40)	ACX60_RS07710/ACX60_RS07715
hypothetical protein/phage integrase	intergenic (+321/‑178)	ACX60_RS07370/ACX60_RS07375
hypothetical protein/aspartate kinase	intergenic (+208/‑2)	ACX60_RS12640/ACX60_RS12645
alanine‑‑tRNA ligase/alpha/beta hydrolase	intergenic (+65/‑222)	ACX60_RS12340/ACX60_RS12345
adeN	coding (190/654 nt)	ACX60_RS07895
adeN	coding (183/654 nt)	ACX60_RS07895
adeN	coding (416/654 nt)	ACX60_RS07895
adeN	coding (410/654 nt)	ACX60_RS07895
adeN	G:177:V	ACX60_RS07895
adeN	V:146:A	ACX60_RS07895
adeN	Q:94*	ACX60_RS07895
adeN	coding (55/654 nt)	ACX60_RS07895
adeL	L341R	ACX60_RS06025
adeL	coding (251‑262/1032 nt)	ACX60_RS06025
adeL	H84Y (CAT→TAT)	ACX60_RS06025
adeL	coding (944/1032 nt)	ACX60_RS06025
adeL	Q310* (CAG→TAG)	ACX60_RS06025
adeL	R:167:R	ACX60_RS06025
adeL	E:337:*	ACX60_RS06025
hypothetical protein	coding (310/768 nt)	ACX60_RS00705
hypothetical protein	coding (684‑693/768 nt)	ACX60_RS00705
tRNA‑Asn	noncoding (6/76 nt)	ACX60_RS05810
ribonuclease PH	coding (253‑264/717 nt)	rph
hypothetical protien	coding (23‑33/396 nt)	ACX60_RS04065
adeS	coding (205/1086 nt)	ACX60_RS09115
adeS	coding (421‑432/1086 nt)	ACX60_RS09115
glutamate synthase subunit alpha	coding (1315‑1324/4482 nt)	gltB
protease SohB	coding (467‑484/963 nt)	ACX60_RS05355
protease SohB	coding (933‑944/963 nt)	ACX60_RS05355
protease SohB	coding (574‑582/963 nt)	ACX60_RS05355
transposase/endonuclease	intergenic (+16/+2)	ACX60_RS18845/ACX60_RS18850
16S ribosomal RNA/hypothetical protein	intergenic (‑463/‑107)	ACX60_RS15000/ACX60_RS15005
16S ribosomal RNA/hypothetical protein	intergenic (‑468/‑102)	ACX60_RS15000/ACX60_RS15005
alanine‑‑tRNA ligase/alpha/beta hydrolase	intergenic (+85/‑202)	ACX60_RS12340/ACX60_RS12345
aspartate kinase	coding (21/1281 nt)	ACX60_RS12645
transposase/hypothetical protein	intergenicÂ (+18/+229)	ACX60_RS18740/ACX60_RS18745																												x
L‑aspartate dehydrogenase	Q25* (CAA→TAA)	ACX60_RS13600
membrane protein	coding (166/456 nt)	ACX60_RS08095
sulfonamide‑resistant dihydropteroate synthase Sul2/transposase	intergenic (‑24/‑69)	ACX60_RS18730/ACX60_RS18735
transposase/hypothetical protein	intergenicÂ (+18/+229)	ACX60_RS18740/ACX60_RS18745
ATPase AAA/GntR family transcriptional regulator	intergenic (‑84/‑13)	ACX60_RS06460/ACX60_RS06465
xanthine dehydrogenase molybdopterin binding subunit	coding (520/2376 nt)	ACX60_RS05725
phosphate ABC transporter ATP‑binding protein/protease SohB	intergenic (+119/‑28)	ACX60_RS05350/ACX60_RS05355
phosphate ABC transporter ATP‑binding protein/protease SohB	intergenic (+129/‑18)	ACX60_RS05350/ACX60_RS05355
transposase/hypothetical protein	intergenic (‑55/+32)	ACX60_RS00595/ACX60_RS00600
type VI secretion system protein/transposase	intergenicÂ (+23/+39)	ACX60_RS00585/ACX60_RS00590
protease SohB	coding (317‑332/963 nt)	ACX60_RS05355
protease SohB	coding (82/963 nt)	ACX60_RS05355
hypothetical protein	pseudogene (211/1172 nt)	ACX60_RS14925
anthranilate dioxygenase reductase	pseudogene (15‑16/369 nt)	antC
hypothetical protein	coding (460/1353 nt)	ACX60_RS14915
hypothetical protein	coding (306/1353 nt)	ACX60_RS14915
hypothetical protein	coding (147/327 nt)	ACX60_RS06435
DNA‑binding response regulator	Q220H (CAA→CAT)	ACX60_RS01345
[truncated: 2 more columns]

## Sheet: Mutations_genes
Lifestyle	Biofilm																								Planktonic
Treatment	No antibiotic						Subinhibitory						Increasing concentrations												No antibiotic						Subinhibitory							Increasing concentrations
Populations	1		2		3		1		2		3		N1			N2	1		2			3			1		2		3		1		2		3		1			2			3			N1		N2
Clones
gyrA
parC
pgpB
hypothetical protein/MFS transporter
50S ribosomal protein L35/MFS transporter
adeN																															85.8	100	97.5	100			92.6	92.6	100	95.9	95.9	96
adeL
adeS
hypothetical protein
DNA‑directed RNA polymerase subunit beta'
hypothetical protein
YggW family oxidoreductase/hypothetical protein
DNA polymerase III sbunit gamma/tau
hypothetical protein/MFS transporter																							39.7								24.8	26.1		31.6
hypothetical protein/phage integrase																							39.7								24.8	26.1		31.6
hypothetical protein/aspartate kinase							20.4		66								31.2				26.9		46.8								33.6	30.4		54.6							41.6
alanine‑‑tRNA ligase/alpha/beta hydrolase							20.4		66								31.2				26.9		46.8								33.6	30.4		54.6							41.6
DNA‑binding protein																															##				##	##								##	##
hypothetical protein
tRNA‑Asn
rph
hypothetical protien
gltB
sohB
transposase/endonuclease								29.8												31.2	41		46.2	26.7
16S ribosomal RNA/hypothetical protein																				91.7
aspartate kinase									88
transposase/hypothetical protein		62.3																										x
L‑aspartate dehydrogenase
membrane protein																													27.1
Sul2/transposase																												76.6
transposase/hypothetical protein																												77.2
ATPase AAA/GntR family transcriptional regulator																														56.7
xanthine dehydrogenase molybdopterin binding subunit																													27.1
phosphate ABC transporter ATP‑binding protein/protease SohB																												77.2
transposase/hypothetical protein																													100
type VI secretion system protein/transposase																													100
hypothetical protein
antC
hypothetical protein																																			44.8
hypothetical protein	80.6
DNA‑binding response regulator

## Sheet: Mutations-by-day
Attributes of the contending mutations each day in the experimental evolution. Numbers reflect total each day and include mutations that might have arisen on a previous day.
		Increasing concentrations					Subinhibitory concentrations
	Days		Nonsynonymous/Synonymous	Intergenic mutations	Structural variants	Total mutations		Nonsynonymous/Synonymous	Intergenic mutations	Structural variants	Total mutations
Biofilm	1		4/1	0	4	8		4/1	0	4	8
	3		5/1	0	8	13		5/1	0	8	13
	4		2/1	0	2	4		6/1	2	8	17
	6		3/1	0	4	8		-	-	-	-
	7		6/1	3	4	10		-	-	-	-
	9		5/1	2	6	11		4/1	1	6	11
	10		7/1	2	5	12		-	-	-	-
	12		7/1	1	6	13		5/1	1	7	12
Planktonic	1		1/1	0	3	4		1/1	0	3	4
	3		2/1	0	2	4		2/1	0	2	4
	4		1/1	0	2	3		1/1	0	3	4
	6		5/1	2	7	12		-	-	-	-
	7		6/1	3	4	10		-	-	-	-
	9		3/1	3	6	10		2/1	1	4	7
	10		5/2	5	6	13		-	-	-	-
	12		7/1	1	5	13		2/1	2	7	11
