# Supplementary figures and images for: Evolutionary pathways to antibiotic resistance are dependent upon environmental structure and bacterial lifestyle
Source: eLife journal article supplement (doi:10.7554/elife.47612), 2019-09-13

A

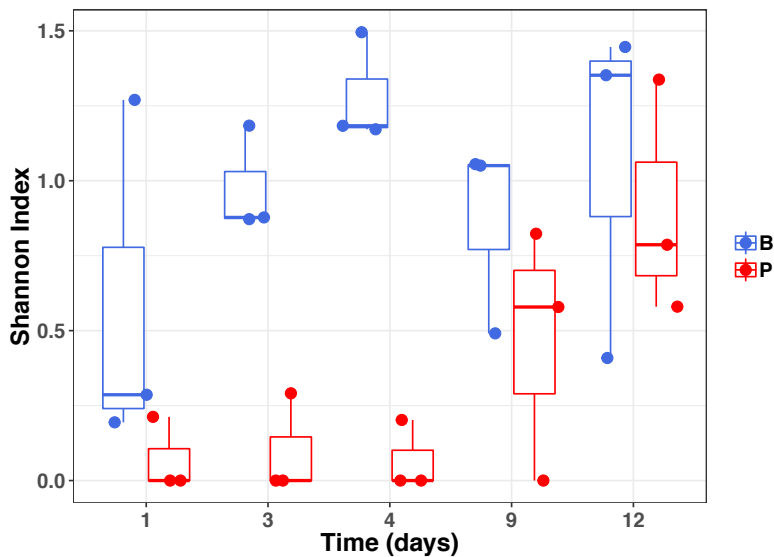

B

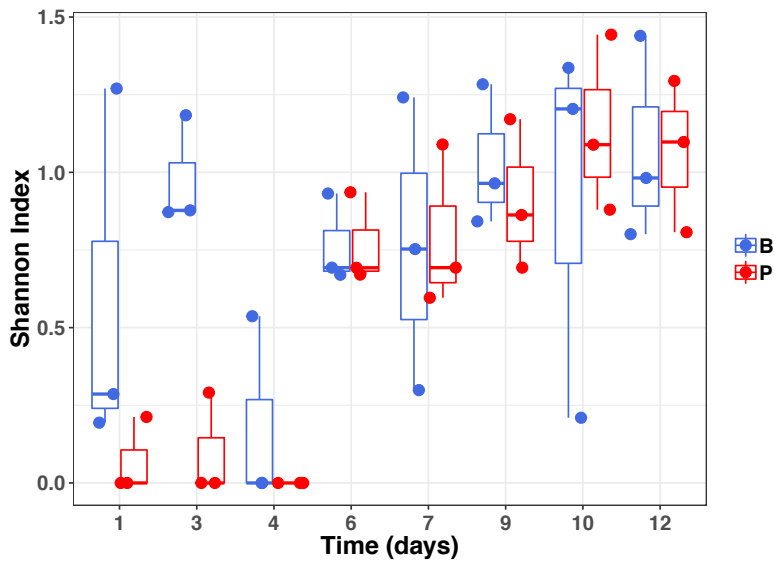

Supplement: supp [file elife-47612-supp-v1.zip › elife_poa_e47612_Figure_2_figure_supplement_1.pdf]

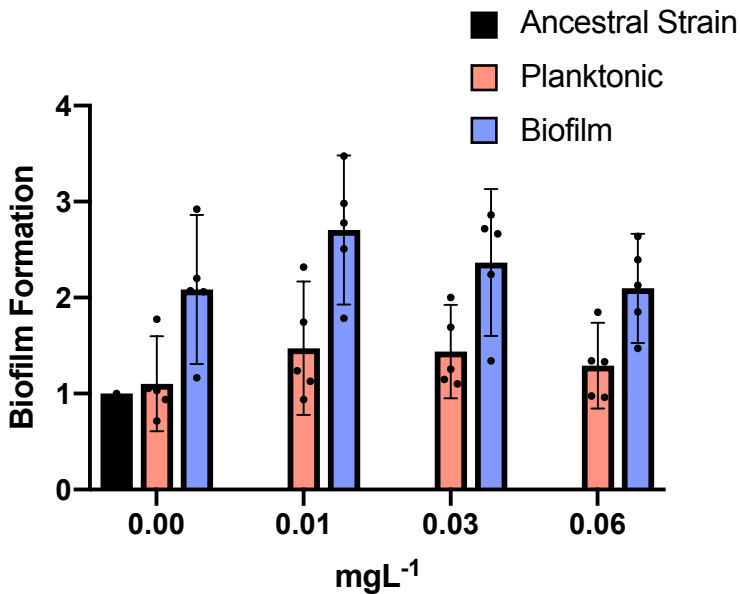

Supplement: supp [file elife-47612-supp-v1.zip › elife_poa_e47612_Figure_2_figure_supplement_3.pdf]
